# Supplementary material for: Longitudinal microstructural changes of cerebral white matter and their association with mobility performance in older persons
Source: PubMed Central journal article supplement (PMC5858767; doi:10.1371/journal.pone.0194051), 2018-03-19
Supplement: pone.0194051.s001.pdf [file pone.0194051.s001.pdf]

**S1 Table. Correlation of mobility with cerebral NAWM DTI indices**

|         | <b>Walk Time<br/>rho (p)</b>     | <b>Tinetti Mobility<br/>rho (p)</b> |
|---------|----------------------------------|-------------------------------------|
| NAWM-FA | -0.289 (0.007)                   | n.s.                                |
| NAWM-AD | n.s.                             | -0.213 (0.05)                       |
| NAWM-RD | 0.303 (0.004)                    | n.s.                                |
| WMHv    | <b>0.414 (7*10<sup>-5</sup>)</b> | <b>-0.283 (0.008)</b>               |

Baseline sample, N=86. Values indicate rho from Spearman correlation test. Values that remain significant after controlling for age and gender are indicated in bold. Significant values not highlighted in bold become not significant after controlling for age, gender and baseline-WMHv. WMHv: baseline volume of white matter hyperintensities; NAWM: normal-appearing cerebral white matter; AD: axial diffusivity; FA: fractional anisotropy; RD: radial diffusivity; n.s. = not significant ( $p>0.05$ ).
