# Supplementary material for: Longitudinal microstructural changes of cerebral white matter and their association with mobility performance in older persons
Source: PubMed Central journal article supplement (PMC5858767; doi:10.1371/journal.pone.0194051), 2018-03-19

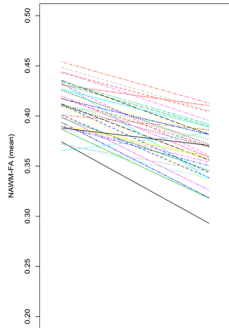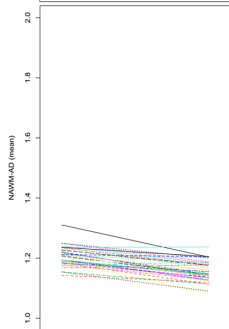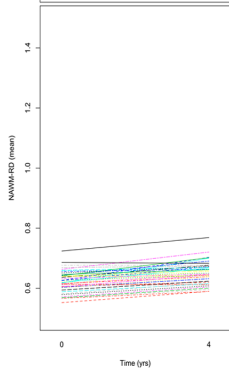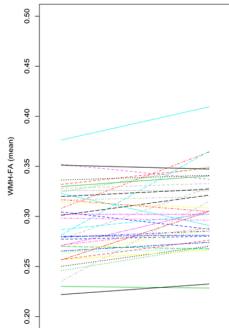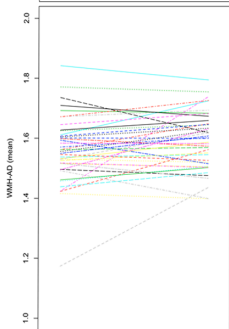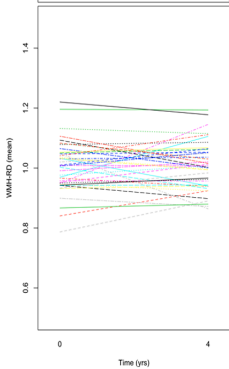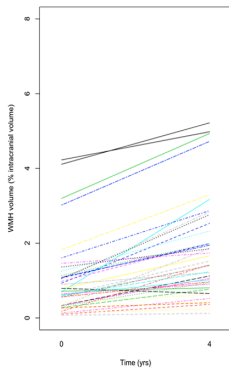

Supplement: pone.0194051.s002.pdf [file pone.0194051.s002.pdf]
